# Supplementary material for: Rule-Based Electronic Sepsis Alerts Identify High-Risk Patients Despite Poor Diagnostic Accuracy: A Real-World Evaluation and Implications for Machine Learning
Source: Research Square preprint supplement (doi:10.21203/rs.3.rs-8188665/v1), 2026-01-13
Supplement: Supplementary file 1 [file 40a406382ebf45375e1d4bd3.docx]

# Appendix

Supplementary table 1. Extended Demographic Characteristics of Study Population. Data presented as n (%), unless otherwise indicated.

|  | Separations | Infection | Sepsis | Any alert | No alert | p-value |
| --- | --- | --- | --- | --- | --- | --- |
| n | 142,053 | 25,619 | 5,058 | 4,011 | 138,042 |  |
| Age (years), median [IQR] | 64 [46-78] | 67 [51-79] | 69 [51-81] | 69 [53-79] | 64 [45-78] | <0.001 |
| Male | 69,790 (49) | 13,275 (52) | 2,656 (52) | 2,237 (56) | 67,553 (49) | <0.001 |
| Aged-care resident | 2,941 (2) | 612 (2) | 168 (3) | 82 (2) | 2,859 (2) | 0.586 |
| Emergency admission | 63,291 (46) | 14,207 (55) | 4,289 (85) | 3,482 (87) | 59,809 (43) | <0.001 |
| Inter-hospital transfer | 3,855 (3) | 1,294 (5) | 662 (13) | 1,246 (31) | 2,609 (2) | <0.001 |
| Indigenous | 420 (0.3) | 88 (0.3) | 19 (0.4) | 10 (0.2) | 410 (0.3) | 0.64 |
| Infectious disease | 25,619 (18) | 25,619 (100) | 5,058 (100) | 2,356 (59) | 23,263 (17) | <0.001 |
| Sepsis-3 | 5,058 (4) | 5,058 (20) | 5,058 (100) | 1,331 (33) | 3,727 (3) | <0.001 |
| Comorbidities: Elixhauser comorbidity score >0 Charlson comorbidity score >0 | 68,556 (48)  34,718 (24) | 12,111 (47)  6,671 (26) | 3,776 (75)  2,409 (48) | 2,935 (73)  1,922 (48) | 65,621 (48)  32,796 (24) | <0.001  <0.001 |
| CCF | 3,307 (2) | 1,552 (6) | 788 (16) | 553 (14) | 2,754 (2) | <0.001 |
| Chronic liver disease | 929 (0.1) | 421 (1.6) | 171 (3) | 172 (4) | 757 (0.5) | <0.001 |
| Chronic Renal disease | 21,989 (15) | 1,591 (6) | 737 (15) | 767 (19) | 21,222 (15) | <0.001 |
| Diabetes | 15,745 (11) | 4,865 (19) | 1,232 (24) | 822 (20) | 14,923 (11) | <0.001 |
| Solid organ malignancy | 11,870 (8) | 2,386 (9) | 903 (18) | 688 (17) | 11,182 (8) | <0.001 |
| Haematological cancer | 7,193 (5) | 762 (3) | 333 (7) | 251 (6) | 6,942 (5) | <0.001 |
| Trauma | 11,688 (8) | 1,687 (7) | 474 (9) | 314 (8) | 11,374 (8) | 0.732 |
| Frailty | 11,755 (8) | 3,271 (13) | 1,611 (32) | 769 (19) | 10,986(8) | <0.001 |
| Mean LOS, Days [SD] | 1.9 [4.8] | 2.5 [5.1] | 4.0 [6.8] | 7.4 [12.2] | 1.8 [4.3] | <0.001 |
| Admission to ICU | 2,708 (2) | 600 (2) | 289 (6) | 511 (13) | 2,197 (2) | <0.001 |
| Hospital Mortality | 1,304 (0.9) | 262 (1) | 125 (2) | 235 (6) | 1,069 (0.8) | <0.001 |
| Time to first alert, day [IQR] | 2 [1-6] | 2 [1-6] | 2 [1-6] | 2 [1-5] | na | na |

*Supplementary table 2. Sensitivity analyses in subgroups with (a) acute infection or (b) those aged >65 or (c) following inter-hospital transfer.*

*(a) Acute Infection*

| Metric | Mean | [95% confidence interval] | |
| --- | --- | --- | --- |
| Prevalence | 20% | 19% | 20.2% |
| Sensitivity | 26.3% | 25.1% | 27.6% |
| Specificity | 96.5% | 96.2% | 96.7% |
| ROC area | 0.614 | 0.608 | 0.62 |
| Likelihood ratio (+) | 7.49 | 6.88 | 8.16 |
| Likelihood ratio (-) | 0.764 | 0.751 | 0.777 |
| Odds ratio | 9.81 | 8.91 | 10.8 |
| Positive predictive value | 64.8% | 62.7% | 66.9% |
| Negative predictive value | 84.2% | 83.7% | 84.6% |

*(b) Elderly, age ≥65yrs*

| Metric | Mean | [95% confidence interval] | |
| --- | --- | --- | --- |
| Prevalence | 4.1% | 4% | 4.28% |
| Sensitivity | 26.2% | 24.6% | 27.9% |
| Specificity | 97.7% | 97.5% | 97.8% |
| ROC area | 0.619 | 0.611 | 0.627 |
| Likelihood ratio (+) | 11.2 | 10.3 | 12.1 |
| Likelihood ratio (-) | 0.756 | 0.739 | 0.772 |
| Odds ratio | 14.8 | 13.4 | 16.3 |
| Positive predictive value | 32.5% | 30.6% | 34.4% |
| Negative predictive value | 96.8% | 96.7% | 97% |

*(c) Inter-hospital transfer*

| Metric | Mean | [95% confidence interval] | |
| --- | --- | --- | --- |
| Prevalence | 31% | 29% | 32.9% |
| Sensitivity | 91.9% | 89.4% | 94% |
| Specificity | 49% | 46.3% | 51.8% |
| ROC area | 0.704 | 0.687 | 0.722 |
| Likelihood ratio (+) | 1.8 | 1.7 | 1.91 |
| Likelihood ratio (-) | 0.165 | 0.125 | 0.219 |
| Odds ratio | 10.9 | 7.94 | 14.9 |
| Positive predictive value | 44.5% | 41.7% | 47.4% |
| Negative predictive value | 93.1% | 91% | 94.9% |
